# Supplementary material for: Mitochondrial Genomic Analysis of Late Onset Alzheimer’s Disease Reveals Protective Haplogroups H6A1A/H6A1B: The Cache County Study on Memory in Aging
Source: PLoS One. 2012 Sep 17;7(9):e45134. doi: 10.1371/journal.pone.0045134 (PMC3444479; doi:10.1371/journal.pone.0045134)
Supplement: Table S1 — Major mitochondrial haplogroups, clusters, and sub-haplogroups. Here we have listed the haplogroup membership of all 1007 individuals in our dataset. The numbers inside the parentheses are the number of individuals with a major mitochondrial sub-haplogroup and the first column shows the membership in each of the represented major mitochondrial haplogroups in our dataset. (XLSX) [file pone.0045134.s002.xlsx]

## Sheet: Sheet1
	H (424)	J (99)	U (147)	K (95)	T (121)	I (21)	W (20)	V (34)	HV (18)	X (8)	C (5)	L (4)	Missing (11)
	H (49)	J1b1a (3)	U1b (2)	K1a (15)	T1 (4)	I (7)	W1 (8)	V (29)	HV (2)	X2b (5)	C4a1 (5)	L3e5 (4)
	H1 (50)	J1c (2)	U2e (2)	K1a1b (13)	T1a (6)	I1a1 (2)	W1c (1)	V1 (3)	HV0b'c (5)	X2c (3)
	H1a (17)	J1c1 (4)	U2e1a (2)	K1a2 (6)	T1a1 (2)	I2 (11)	W3 (7)	V2 (2)	HV9 (11)
	H1a1 (10)	J1c1b1a (6)	U3b (1)	K1a3a1 (20)	T2 (15)	I4 (1)	W4 (4)
	H1b (23)	J1c2 (2)	U4a1 (3)	K1a4 (1)	T2a (9)
	H1c (28)	J1c2b (3)	U4a1b (3)	K1a4a1 (17)	T2b (73)
	H1c1 (2)	J1c2b1a (4)	U4a2 (15)	K1b1a (6)	T2c (3)
	H1e (13)	J1c3 (4)	U4b1 (2)	K1b2 (1)	T2e (9)
	H1g (7)	J1c3a1 (2)	U4c (6)	K1c1b (6)
	H2a2a (4)	J1c3b (1)	U5a (9)	K1c2 (2)
	H2a3 (3)	J1c3b1 (11)	U5a1 (32)	K2b (8)
	H3 (21)	J1c5 (12)	U5b1 (3)
	H3d (1)	J1c5a (4)	U5b1b (7)
	H4a (29)	J1c6 (4)	U5b1d (9)
	H4a1 (12)	J1c8 (7)	U5b2 (45)
	H4a1a1 (2)	J2a1a (22)	U5b3f (1)
	H4a1b (1)	J2a1a1b (8)	U8a1 (5)
	H5 (13)
	H5a (10)
	H5a1 (21)
	H6a1a (13)
	H6a1b (29)
	H7 (10)
	H7a (1)
	H10 (11)
	H11 (15)
	H13 (24)
	H13a1a (1)
	H13a1a1 (2)
	H15 (1)
	H17 (1)
